# Supplementary material for: Localized hypermutation and associated gene losses in legume chloroplast genomes
Source: HighWire-hosted journal article supplement (doi:10.1101/gr.111955.110), 2010-10-26
Supplement: Magee_etal_SI_15sep2010.pdf [file Magee_etal_SI_15sep2010.pdf]

## Supplementary Information

### Localized hypermutation and associated gene losses in legume chloroplast genomes

Alan M. Magee<sup>1</sup>, Sue Aspinall<sup>2</sup>, Danny W. Rice<sup>3</sup>, Brian P. Cusack<sup>1</sup>, Marie Sémon<sup>4</sup>,  
Antoinette S. Perry<sup>1</sup>, Sasa Stefanovic<sup>5</sup>, Dan Milbourne<sup>6</sup>, Susanne Barth<sup>6</sup>,  
Jeffrey D. Palmer<sup>3</sup>, John C. Gray<sup>2</sup>, Tony A. Kavanagh<sup>1</sup>, and Kenneth H. Wolfe<sup>1</sup>

<sup>1</sup> Smurfit Institute of Genetics, Trinity College, Dublin 2, Ireland

<sup>2</sup> Department of Plant Sciences, University of Cambridge, Downing Street, Cambridge CB2 3EA,  
United Kingdom

<sup>3</sup> Department of Biology, Indiana University, Bloomington, Indiana 47405

<sup>4</sup> Institut de Génomique Fonctionnelle de Lyon, Université de Lyon, CNRS, INRA, UCB Lyon 1,  
Ecole Normale Supérieure de Lyon, 69364 Lyon Cedex 07, France

<sup>5</sup> Department of Biology, University of Toronto, Mississauga, Ontario L5L 1C6, Canada

<sup>6</sup> Teagasc Crops Research Centre, Oak Park, Carlow, Ireland

## Supplementary Figure legends

Figure S1. Synonymous and nonsynonymous divergence in angiosperm chloroplast *matK* (A), *rbcL* (B), and *ycf4* (C) genes. The trees are the same as those in Figure 1, except for the addition of taxon names. Shown are *dN* (left) and *dS* (right) trees resulting from a codon-based likelihood analysis and a constrained topology, rooted using gymnosperm sequences (which are not included in the trees). See Methods for details of tree construction. The species are in the same order from top to bottom in all trees to the greatest extent possible. In (C), numbers after species names indicate the *ycf4* gene length in codons. The *ycf4* pseudogenes in *Desmodium* and *Clitoria* are included in the *ycf4* trees and labeled in the left panel. The *Lathyrus odoratus* and *Pisum sativum ycf4* pseudogenes were not included in the tree because they are truncated and very divergent, making their boundaries hard to define.

Figure S2. Dot matrix plots showing repetitive DNA around the *accD-ycf4* region in legumes. All plots are drawn to the same scale and show (A) self-comparison of *Pisum sativum*, (B) self-comparison of *Lathyrus sativus*, (C) comparison of *P. sativum* to *L. sativus*, and (D) self-comparison of *L. latifolius*. Panels A, B and D used a criterion of 28 matching bases per 30 bp window, and panel C used a criterion of 20 matches per 30 bp window. Black dots show matches on the same DNA strand and red dots show matches on the complementary strand.

Figure S3. (A-C) Gene maps of the chloroplast genomes of *Lathyrus sativus* (grasspea), *Pisum sativum* (pea), and *Nicotiana tabacum* (tobacco), drawn using GenomeVx (Conant and Wolfe 2008). Larger versions of the grasspea and pea maps are presented in Figure S7. Uppercase letters A through R show the 18 segments of conserved gene order among these three genomes, with plus or minus signs indicating orientation. The tobacco map shows an isomer whose small single copy region is inverted relative to the usual presentation of this genome (Shinozaki et al. 1986). The dashed line in region A of the tobacco map represents the copy of the IR that was deleted in legumes. (D) One scenario for rearranging the 18 conserved segments to turn an ancestral angiosperm genome with a tobacco-like gene order (but lacking an IR) into the current *L. sativus* and *P. sativum* gene orders, using only inversions. This scenario was calculated using GRIMM (Tesler 2002). The specific 6- and 8-step paths leading to *L. sativus* and *P. sativum*, respectively, are computationally optimal solutions (most parsimonious), but of course are not necessarily what actually happened. The 8-step path to *P. sativum* proposed by GRIMM involves the same set of inversions, but in a different order, to those proposed by Palmer et al. (1988) whose segment nomenclature is shown at the bottom. (E) Phylogenetic context of inversions and gene losses. The relative order of events within individual branches is not known. We calculated *T. subterraneum* (Cai et al. 2008) to have a total of 15

inversions and 4 protein gene losses, using GRIMM with a modified annotation that included *ycf1*, *ycf4*, *rps18* and *trnG*-UCU and ignored a duplicate copy of *trnI*-CAU.

Figure S4. Dot matrix plots of self-similarity in six chloroplast genome sequences, using a criterion of 28 matches per 30 bp window. To allow tandem and near-tandem repeats to be seen, we do not show the major diagonal which would normally appear as a solid black line running from the bottom-left to the top-right corner of each plot. The IR appears as a pair of long red (inverted orientation) diagonals in the four IR-containing genomes. Arrows show the positions (where present) of *ycf4*, *accD* and *psaI* in the *P. sativum* and *L. sativus* plots.

Figure S5. Nucleotide sequence alignment between *L. latifolius* and *L. cirrhosus* in the *accD-ycf4-cemA* region. Caret symbols show nucleotide substitutions. In *L. latifolius*, blue triangles show the 57-bp repeat (lowercase letters indicate differences relative to the consensus), and orange triangles show the 67-bp repeat (the two copies are identical). Complete copies of the repeats are labeled A1-A6 and B1-B2, and incomplete copies are shown by triangles without labels. The two largest repeat sequences in the *L. cirrhosus accD-ycf4* intergenic region are shown by magenta and purple underlining (2 x 15 bp each). Sequences were aligned using Muscle and were constrained (after inspection of dot-matrix plots) to align only the B1 and A1 copies of the *L. latifolius* repeats to *L. cirrhosus*.

Figure S6. The *LPD2-accD* fusion in *Trifolium repens*.

(A) Comparative organization of *LPD* genes and cDNAs in *Medicago truncatula* and *T. repens*, not drawn to scale. cDNA sequences for the four genes were inferred from EST data. Intron/exon organization is known only for the *M. truncatula* genes, and is conserved between *LPD1* and *LPD2* except in the transit peptide region. The chloroplast-derived *accD* sequence appears to have replaced the last two exons of *T. repens LPD2*.

(B) Evidence that the *T. repens* fusion gene is orthologous to *M. truncatula LPD2*. Synonymous (*dS*) and nonsynonymous (*dN*) nucleotide divergences among the four genes were calculated using yn00 for the region corresponding to exons 2-13 of *M. truncatula LPD2*. Divergence between orthologs (shaded boxes) is lower than between paralogs.

(C) Assembly of the cDNA sequence of the *T. repens LPD2-accD* fusion gene from EST data. Five EST reads cross the junction between *LPD2* and *accD*.

(D) Alignment of the predicted *T. repens LPD2-AccD* fusion protein (Tr\_LPD2-accD) to other *LPD* and *AccD* proteins. The complete sequence of the fusion protein (805 residues) is shown. Residues 1-512 are aligned to plastid lipoamide dehydrogenases from *M. truncatula* (Mt\_LPD1 and Mt\_LPD2) and *T. repens* (Tr\_LPD1). Residues 513-805 are aligned to the *Lotus japonicus* chloroplast *accD* gene translation (Lj\_accD). Protein domains in *LPD* are indicated (Lutziger and Oliver 2000), including a

conserved motif (HAHPT) in the interface domain that is highly conserved among plastid, mitochondrial and bacterial LPD proteins but has been lost from the *T. repens* fusion protein. The site corresponding to the location of the intron between exons 13 and 14 of *M. truncatula* *LPD2* is shown by a triangle. In the *AccD* alignment, similarity to the *T. repens* fusion protein begins at residue 209 of *L. japonicus* *AccD*. The location of the carboxyl transferase domain (Zhang et al. 2003) in *AccD* is marked. There are no known functional domains in *AccD* upstream of this domain. An arrow indicates the site corresponding to position 267 of pea *AccD*, where mRNA editing converts a Ser codon to a Leu codon (Sasaki et al. 2001). This site is edited in one of the two *Lotus* ESTs available (accession numbers GO021515 and DC597685).

(E) Confirmation of the junction between *LPD2* and *accD* in *T. repens* mRNA by reverse transcriptase PCR and Sanger sequencing. The arrow marks the junction. The primers used for amplification were 5'- AAAATGAAGGGGAGGGACAT and 5'- GCACTGAACCCACAAATGG, amplifying a 200 bp fragment centered on the junction (positions 1465 to 1664 of GenBank accession HM029367).

(F) Phylogenetic relationship of *Trifolium* nuclear *AccD* sequences to chloroplast *AccD* sequences from other angiosperms. The tree was constructed from amino acid sequences of the C-terminal part of the protein (beginning at residue 513 of the *T. repens* *LPD2*-*AccD* protein). Sequences were aligned using Muscle and the tree was constructed using PhyML (WAG+Γ substitution model, 8 rate classes) as implemented in SeaView (Gouy et al. 2010).

Figure S7. Gene maps of (A) the *Lathyrus sativus* (grasspea) chloroplast genome, and (B) the *Pisum sativum* (pea) chloroplast genome.

### Supplementary Tables.

Table S1 is a separate Excel file.

**Table S2.** Synonymous and nonsynonymous divergence between pea and sweetpea nuclear genes.

| Pea<br>GenBank acc.<br>number | Sweetpea<br>EST<br>contig | Description                                  | <i>S</i> | <i>N</i> | Omega<br>( <i>dN/dS</i> ) | <i>dN</i> | S.E.   | <i>dS</i> | S.E.   |
|-------------------------------|---------------------------|----------------------------------------------|----------|----------|---------------------------|-----------|--------|-----------|--------|
| D89619                        | CL884                     | Cycloartenol synthase                        | 113.6    | 282.4    | 0.0000                    | 0.0000    | 0.0000 | 0.0178    | 0.0126 |
| AY166633                      | CL64                      | Malate dehydrogenase (MDH)                   | 266.6    | 678.4    | 0.0871                    | 0.0059    | 0.0030 | 0.0680    | 0.0171 |
| AF095284                      | CL564                     | Tic22                                        | 180.9    | 416.1    | 0.5556                    | 0.0421    | 0.0103 | 0.0758    | 0.0214 |
| AF043905                      | CL118                     | Plastoglobule associated protein PG1         | 259.7    | 613.3    | 0.2124                    | 0.0165    | 0.0052 | 0.0776    | 0.0182 |
| Z31559                        | CL1383                    | AccA acetyl-CoA carboxylase                  | 129.9    | 422.1    | 0.8786                    | 0.0682    | 0.0132 | 0.0777    | 0.0258 |
| AF095285                      | CL1536                    | Tic20                                        | 131.9    | 390.1    | 0.7360                    | 0.0573    | 0.0125 | 0.0778    | 0.0263 |
| X89828                        | CL26                      | Fructose-1, 6-biphosphate aldolase           | 217.9    | 601.1    | 0.1614                    | 0.0134    | 0.0048 | 0.0832    | 0.0207 |
| M94558                        | CL523                     | ATP synthase delta subunit                   | 200.1    | 522.9    | 1.1445                    | 0.0966    | 0.0143 | 0.0844    | 0.0221 |
| AJ630104                      | CL810                     | Galactokinase (galK gene)                    | 244.5    | 661.5    | 0.3449                    | 0.0299    | 0.0068 | 0.0866    | 0.0202 |
| AJ250769                      | CL822                     | Cytosolic phosphoglucomutase (PGM gene)      | 133.1    | 445.9    | 0.1284                    | 0.0113    | 0.0051 | 0.0880    | 0.0271 |
| AY367058                      | CL240                     | SAT5 mRNA                                    | 155.8    | 429.2    | 0.1579                    | 0.0141    | 0.0058 | 0.0894    | 0.0255 |
| AB104529                      | CL589                     | LKA mRNA for brassinosteroid receptor        | 293.6    | 726.4    | 0.2149                    | 0.0196    | 0.0053 | 0.0911    | 0.0187 |
| U56697                        | CL402                     | Pyruvate dehydrogenase E1beta                | 210.4    | 689.6    | 0.1894                    | 0.0176    | 0.0051 | 0.0930    | 0.0229 |
| L29077                        | CL80                      | Ubiquitin conjugating enzyme (UBC4)          | 120.4    | 323.6    | 0.0314                    | 0.0031    | 0.0031 | 0.0987    | 0.0308 |
| AF275639                      | CL1669                    | Cytosolic phosphoglycerate kinase (PGK)      | 175.9    | 517.1    | 0.1168                    | 0.0117    | 0.0048 | 0.1002    | 0.0264 |
| M73744                        | CL337                     | IM30 protein mRNA                            | 156.7    | 461.3    | 0.1268                    | 0.0131    | 0.0054 | 0.1035    | 0.0276 |
| X63604                        | CL831                     | AtpC (gamma subunit of ATP synthase)         | 177.6    | 395.4    | 0.2748                    | 0.0284    | 0.0086 | 0.1035    | 0.0259 |
| X60170                        | CL48                      | Mn superoxide dismutase (SOD)                | 137.0    | 496.0    | 0.1238                    | 0.0132    | 0.0052 | 0.1068    | 0.0300 |
| AJ251646                      | CL1446                    | beta-1,3-glucanase GNS2                      | 171.8    | 416.2    | 0.3448                    | 0.0370    | 0.0096 | 0.1072    | 0.0268 |
| AJ001009                      | CL643                     | OEP24 preprotein                             | 141.6    | 446.4    | 0.1045                    | 0.0113    | 0.0051 | 0.1080    | 0.0301 |
| AJ005589                      | CL1292                    | Protein tyrosine phosphatase                 | 146.7    | 405.3    | 0.5498                    | 0.0617    | 0.0127 | 0.1122    | 0.0302 |
| X63605                        | CL46                      | PetC mRNA for chloroplast Rieske FeS protein | 126.6    | 380.4    | 0.2615                    | 0.0295    | 0.0090 | 0.1129    | 0.0327 |
| X53035                        | CL800                     | P34 protein kinase                           | 73.9     | 346.1    | 0.0489                    | 0.0058    | 0.0041 | 0.1186    | 0.0435 |
| DQ535894                      | CL1210                    | Tic21                                        | 233.1    | 501.9    | 0.2340                    | 0.0285    | 0.0077 | 0.1216    | 0.0246 |
| Y17186                        | CL664                     | Translation initiation factor eIF-4A         | 161.3    | 462.7    | 0.0713                    | 0.0087    | 0.0044 | 0.1219    | 0.0297 |
| AF002698                      | CL1095                    | NADPH-cytochrome P450 reductase (PSC450R1)   | 186.6    | 575.4    | 0.0677                    | 0.0087    | 0.0039 | 0.1293    | 0.0285 |
| AJ000520                      | CL1365                    | Tic55                                        | 205.7    | 646.3    | 0.1324                    | 0.0172    | 0.0052 | 0.1301    | 0.0280 |
| DQ026703                      | CL425                     | WD-40 repeat protein (MSI1)                  | 109.9    | 673.1    | 0.0114                    | 0.0015    | 0.0015 | 0.1303    | 0.0376 |

|                                          |        |                                              |       |       |        |        |        |        |        |
|------------------------------------------|--------|----------------------------------------------|-------|-------|--------|--------|--------|--------|--------|
| M71235                                   | CL1699 | Aminolevulinic acid dehydratase (ALAD)       | 142.4 | 457.6 | 0.1183 | 0.0155 | 0.0059 | 0.1307 | 0.0327 |
| U60592                                   | CL178  | S-adenosylmethionine decarboxylase           | 263.3 | 795.7 | 0.1892 | 0.0256 | 0.0057 | 0.1352 | 0.0250 |
| AF148506                                 | CL1175 | Hs1pro-1 homolog                             | 64.5  | 217.5 | 0.0334 | 0.0046 | 0.0046 | 0.1383 | 0.0514 |
| DQ845340                                 | CL323  | CRY mRNA                                     | 116.6 | 453.4 | 0.1087 | 0.0156 | 0.0059 | 0.1435 | 0.0388 |
| AF109922                                 | CL201  | Sucrose transport protein SUT1               | 196.7 | 601.3 | 0.1526 | 0.0222 | 0.0062 | 0.1457 | 0.0297 |
| X54359                                   | CL832  | Clone 26g                                    | 160.9 | 529.1 | 0.1714 | 0.0250 | 0.0070 | 0.1458 | 0.0333 |
| X82404                                   | CL558  | SecA                                         | 204.6 | 662.4 | 0.0512 | 0.0076 | 0.0034 | 0.1483 | 0.0301 |
| AY299688                                 | CL353  | RPA 32kDa mRNA                               | 165.9 | 419.1 | 0.2946 | 0.0443 | 0.0105 | 0.1504 | 0.0341 |
| X60169                                   | CL343  | Catalase                                     | 230.2 | 675.8 | 0.1382 | 0.0210 | 0.0056 | 0.1520 | 0.0289 |
| AY822467                                 | CL869  | AT-rich element binding factor 2 (ATF2)      | 94.2  | 196.8 | 0.0326 | 0.0051 | 0.0051 | 0.1566 | 0.0461 |
| AF191098                                 | CL197  | Nucleoside diphosphate kinase (NDPK)         | 180.7 | 518.3 | 0.1242 | 0.0195 | 0.0062 | 0.1573 | 0.0335 |
| AF284759                                 | CL221  | Chloroplast TatC protein                     | 126.1 | 497.9 | 0.0879 | 0.0142 | 0.0054 | 0.1615 | 0.0402 |
| X60373                                   | CL1027 | Glutathione reductase                        | 161.4 | 399.6 | 0.1403 | 0.0229 | 0.0077 | 0.1633 | 0.0364 |
| L34578                                   | CL264  | Histone H1 (H1-41)                           | 189.6 | 356.4 | 0.2079 | 0.0346 | 0.0101 | 0.1665 | 0.0330 |
| X70703                                   | CL485  | MAP kinase homologue                         | 126.6 | 443.4 | 0.0395 | 0.0068 | 0.0039 | 0.1720 | 0.0421 |
| M60952                                   | CL383  | Chloroplast ribosomal protein (CL22)         | 150.2 | 428.8 | 0.5346 | 0.0922 | 0.0154 | 0.1724 | 0.0379 |
| AF079850                                 | CL362  | Nodule-enhanced malate dehydrogenase (NEMDH) | 151.9 | 418.1 | 0.1807 | 0.0318 | 0.0089 | 0.1758 | 0.0397 |
| X66061                                   | CL833  | Thiolprotease                                | 190.0 | 623.0 | 0.1985 | 0.0354 | 0.0077 | 0.1781 | 0.0349 |
| X65155                                   | CL179  | Ribosomal protein L9                         | 114.7 | 464.3 | 0.0407 | 0.0076 | 0.0041 | 0.1863 | 0.0463 |
| AF323104                                 | CL1455 | Phosphatase-like protein Psc923              | 152.8 | 456.2 | 0.1552 | 0.0291 | 0.0081 | 0.1872 | 0.0395 |
| X54358                                   | CL767  | Clone 15a                                    | 155.1 | 477.9 | 0.0547 | 0.0105 | 0.0047 | 0.1927 | 0.0400 |
| AF002248                                 | CL732  | PSI LHC Chl a/b-binding protein (lhcA-P4)    | 200.7 | 555.3 | 0.0992 | 0.0201 | 0.0061 | 0.2025 | 0.0365 |
| X62077                                   | CL501  | ApxI mRNA for ascorbate peroxidase           | 167.4 | 582.6 | 0.0933 | 0.0191 | 0.0058 | 0.2051 | 0.0416 |
| AF144684                                 | CL682  | SecY                                         | 242.4 | 813.6 | 0.1606 | 0.0339 | 0.0066 | 0.2114 | 0.0339 |
| Y15253                                   | CL1298 | Phospholipase C                              | 100.6 | 424.4 | 0.0853 | 0.0191 | 0.0068 | 0.2238 | 0.0556 |
| AY830931                                 | CL1039 | FVE mRNA                                     | 113.8 | 471.2 | 0.0374 | 0.0085 | 0.0043 | 0.2281 | 0.0522 |
| AJ315851                                 | CL232  | 2-Cys peroxiredoxin                          | 174.6 | 530.4 | 0.0894 | 0.0239 | 0.0068 | 0.2677 | 0.0471 |
| AJ243759                                 | CL746  | Outer envelope protein OEP37                 | 139.7 | 391.3 | 0.2253 | 0.0640 | 0.0132 | 0.2841 | 0.0559 |
| Median values and total numbers of sites |        |                                              | 9340  | 27788 | 0.1353 | 0.0191 |        | 0.1305 |        |

Genes are sorted in order of increasing  $dS$ . An arbitrary cutoff of  $dS = 0.3$  was applied to remove probable paralogs.  $S$  and  $N$  are the numbers of synonymous and nonsynonymous sites in each sequence.

## References for Supplementary Information

- Cai Z, Guisinger M, Kim HG, Ruck E, Blazier JC, McMurtry V, Kuehl JV, Boore J, Jansen RK. 2008. Extensive reorganization of the plastid genome of *Trifolium subterraneum* (Fabaceae) is associated with numerous repeated sequences and novel DNA insertions. *J Mol Evol* **67**: 696-704.
- Conant GC, Wolfe KH. 2008. GenomeVx: simple web-based creation of editable circular chromosome maps. *Bioinformatics* **24**: 861-862.
- Gouy M, Guindon S, Gascuel O. 2010. SeaView version 4: A multiplatform graphical user interface for sequence alignment and phylogenetic tree building. *Mol Biol Evol* **27**: 221-224.
- Lutziger I, Oliver DJ. 2000. Molecular evidence of a unique lipoamide dehydrogenase in plastids: analysis of plastidic lipoamide dehydrogenase from *Arabidopsis thaliana*. *FEBS Lett* **484**: 12-16.
- Palmer JD, Osorio B, Thompson WF. 1988. Evolutionary significance of inversions in legume chloroplast DNAs. *Curr Genet* **14**: 65-74.
- Sasaki Y, Kozaki A, Ohmori A, Iguchi H, Nagano Y. 2001. Chloroplast RNA editing required for functional acetyl-CoA carboxylase in plants. *J Biol Chem* **276**: 3937-3940.
- Shinozaki K, Ohme M, Tanaka M, Wakasugi T, Hayashida N, Matsubayashi T, Zaita N, Chunwongse J, Obokata J, Yamaguchi-Shinozaki K, et al. 1986. The complete nucleotide sequence of tobacco chloroplast genome: its gene organization and expression. *EMBO J* **5**: 2043-2049.
- Tesler G. 2002. GRIMM: genome rearrangements web server. *Bioinformatics* **18**: 492-493.
- Zhang H, Yang Z, Shen Y, Tong L. 2003. Crystal structure of the carboxyltransferase domain of acetyl-coenzyme A carboxylase. *Science* **299**: 2064-2067.

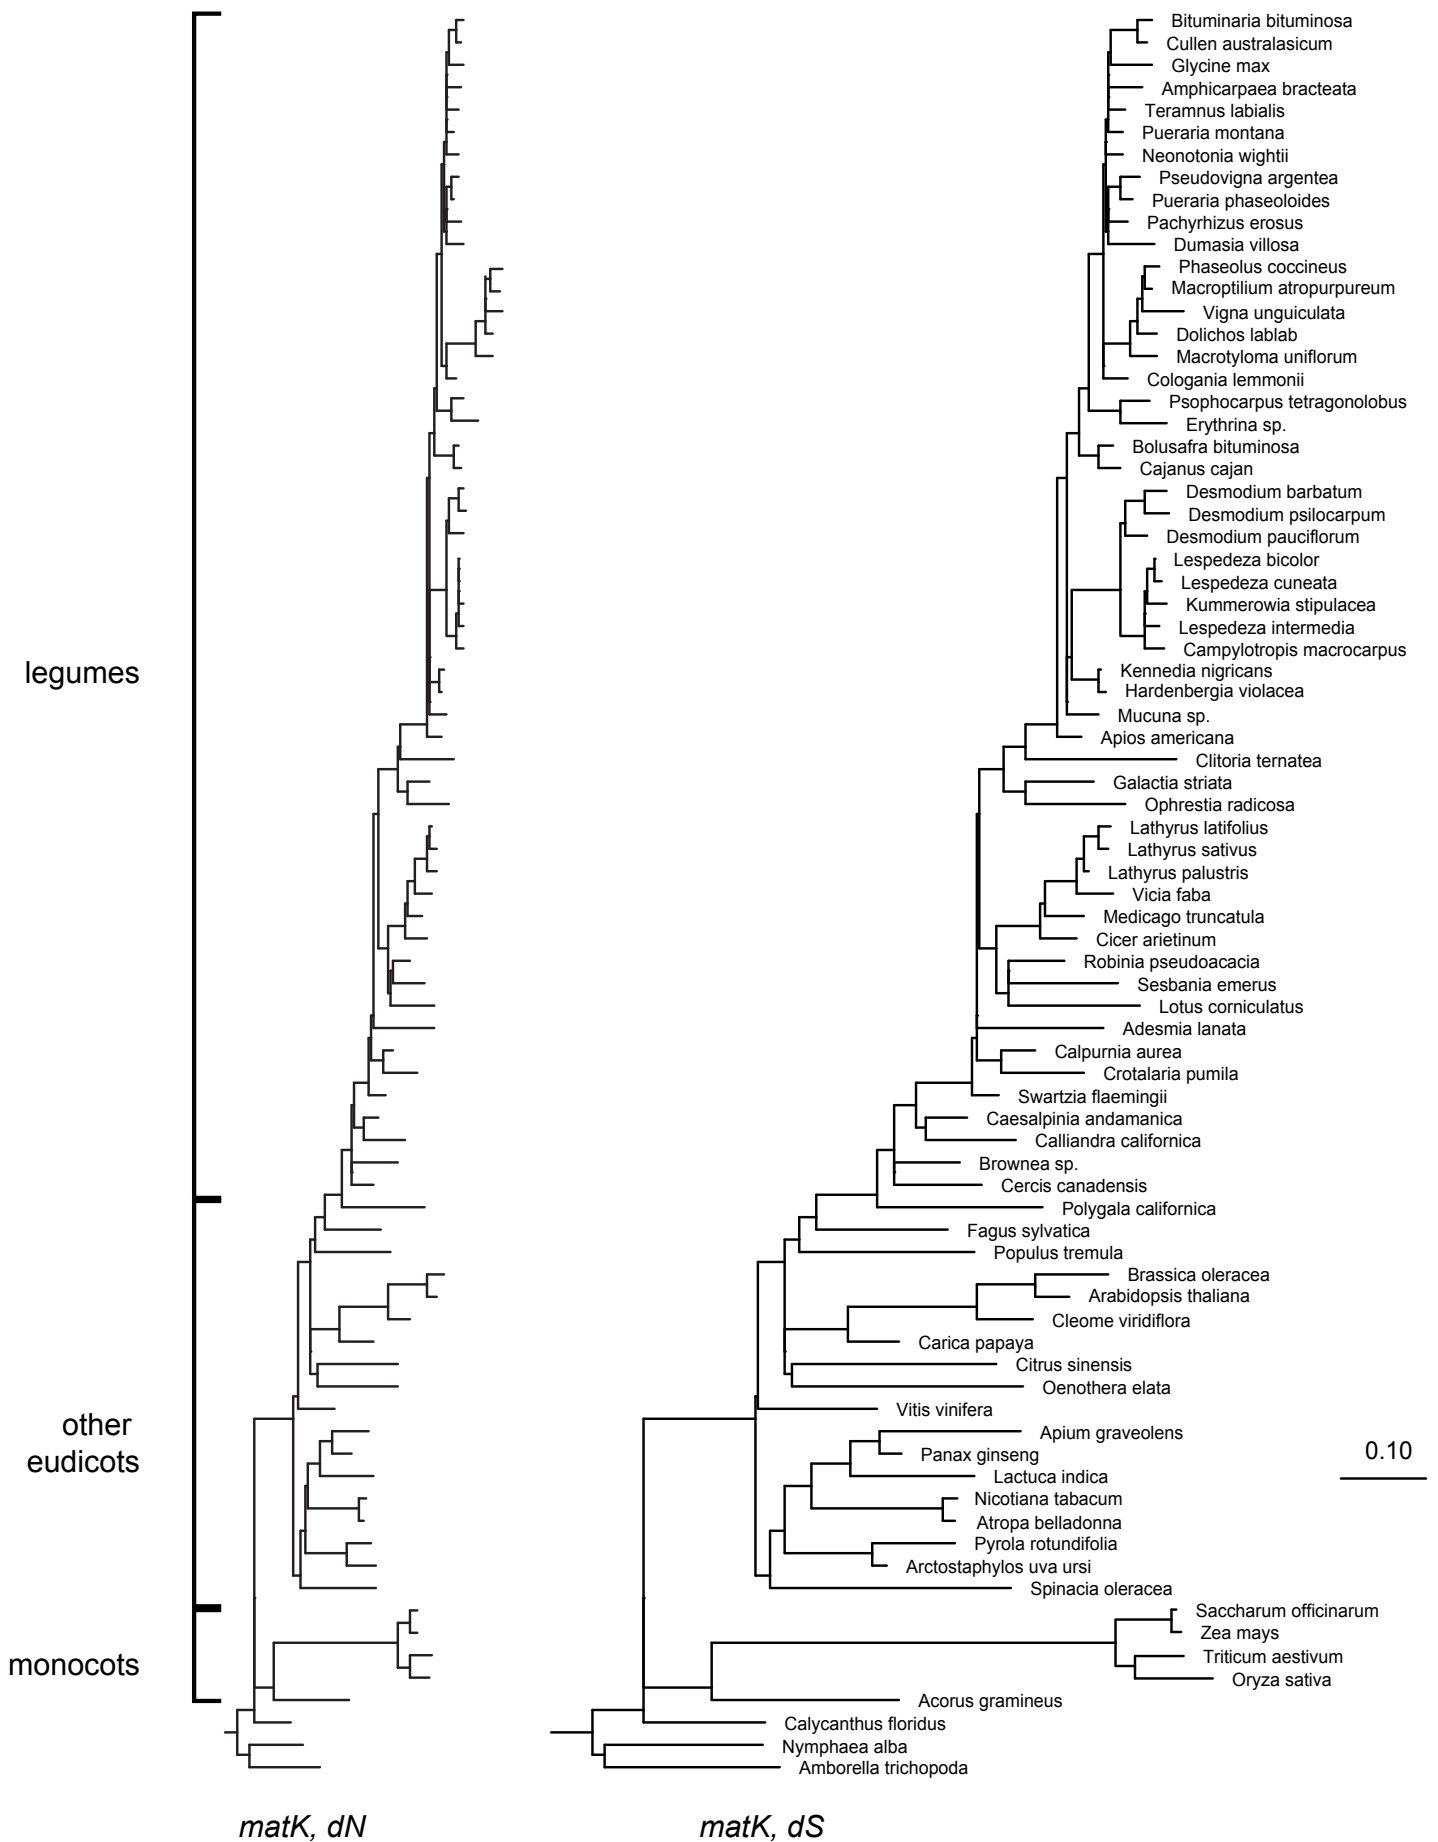

Figure S1A



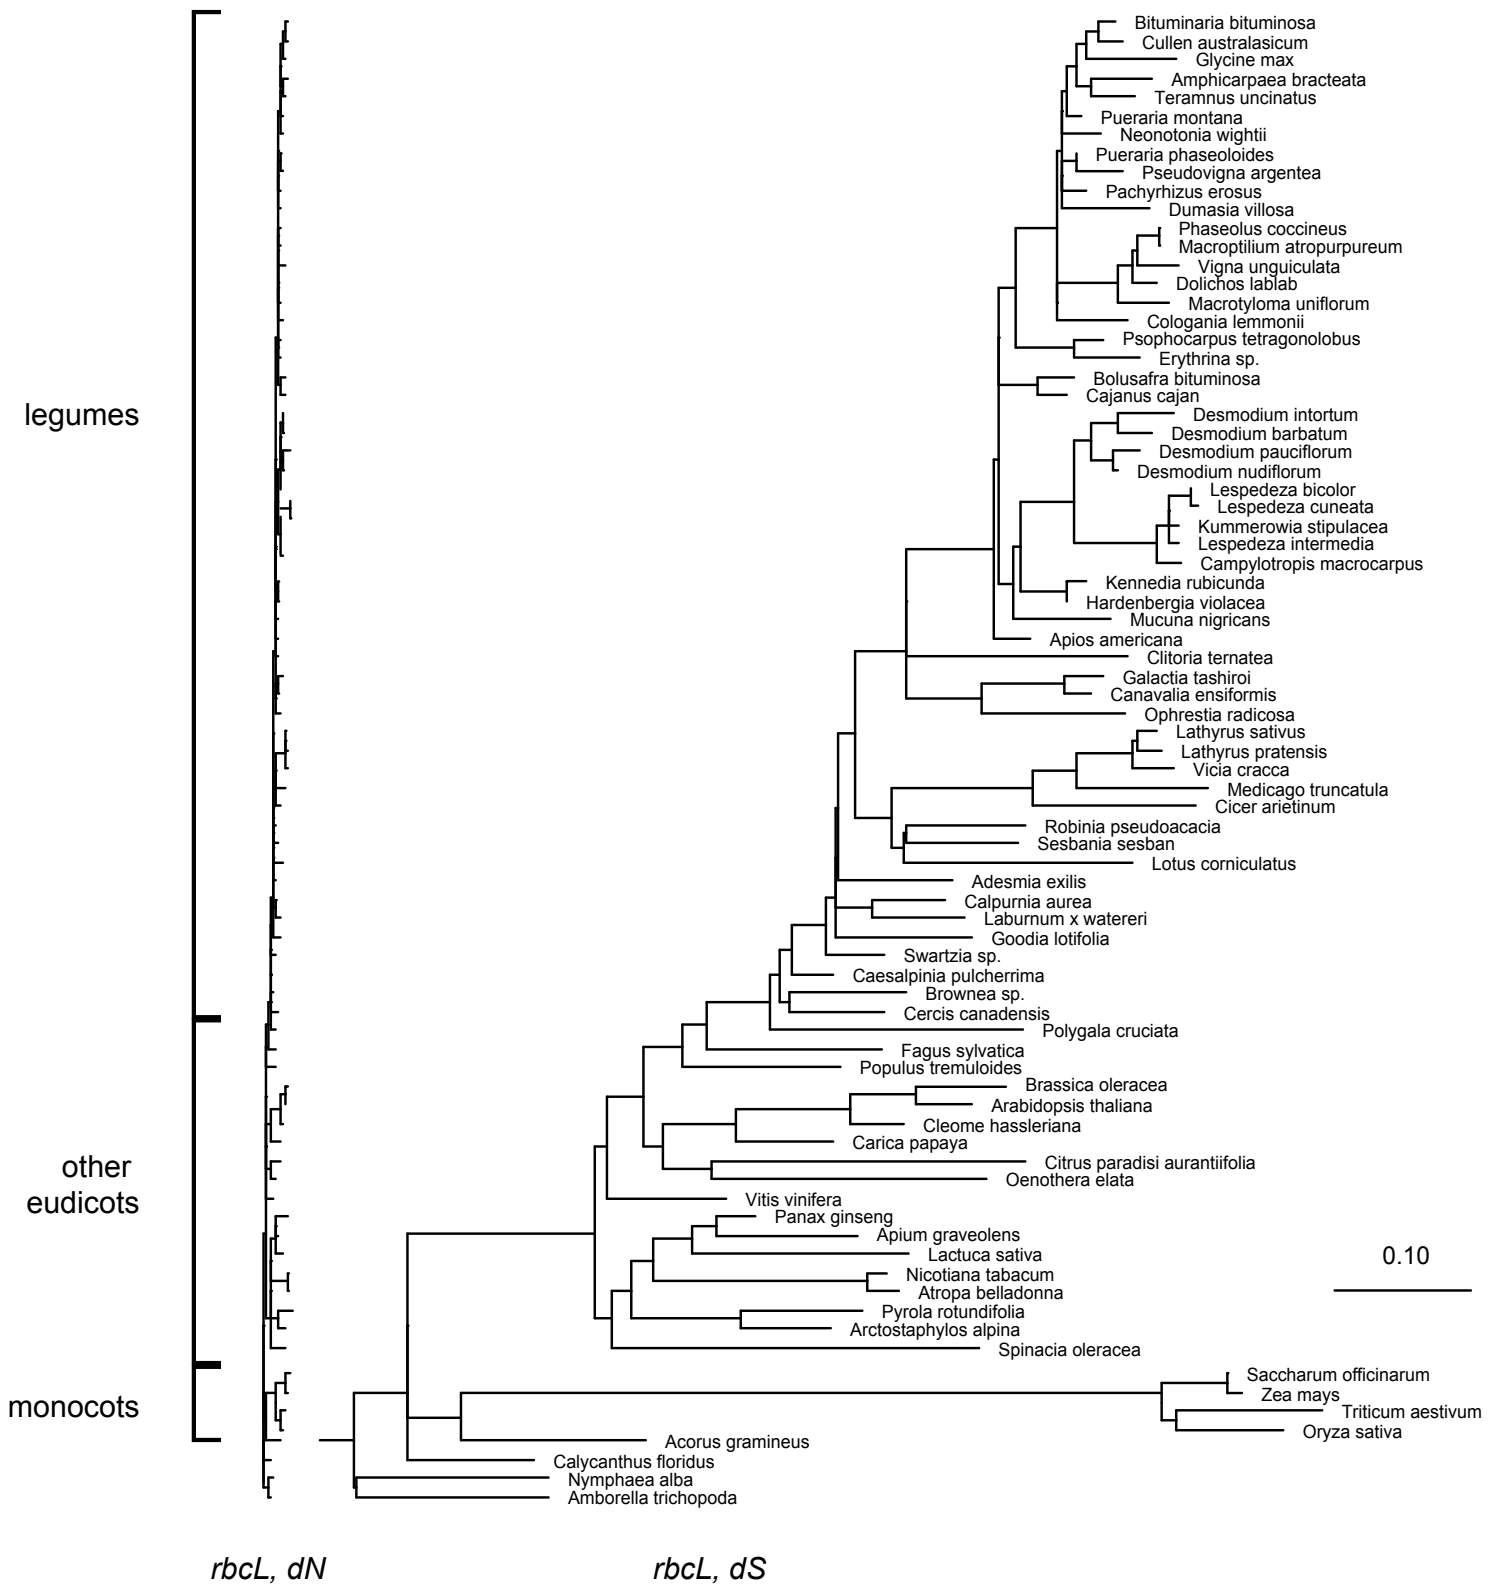

Figure S1B

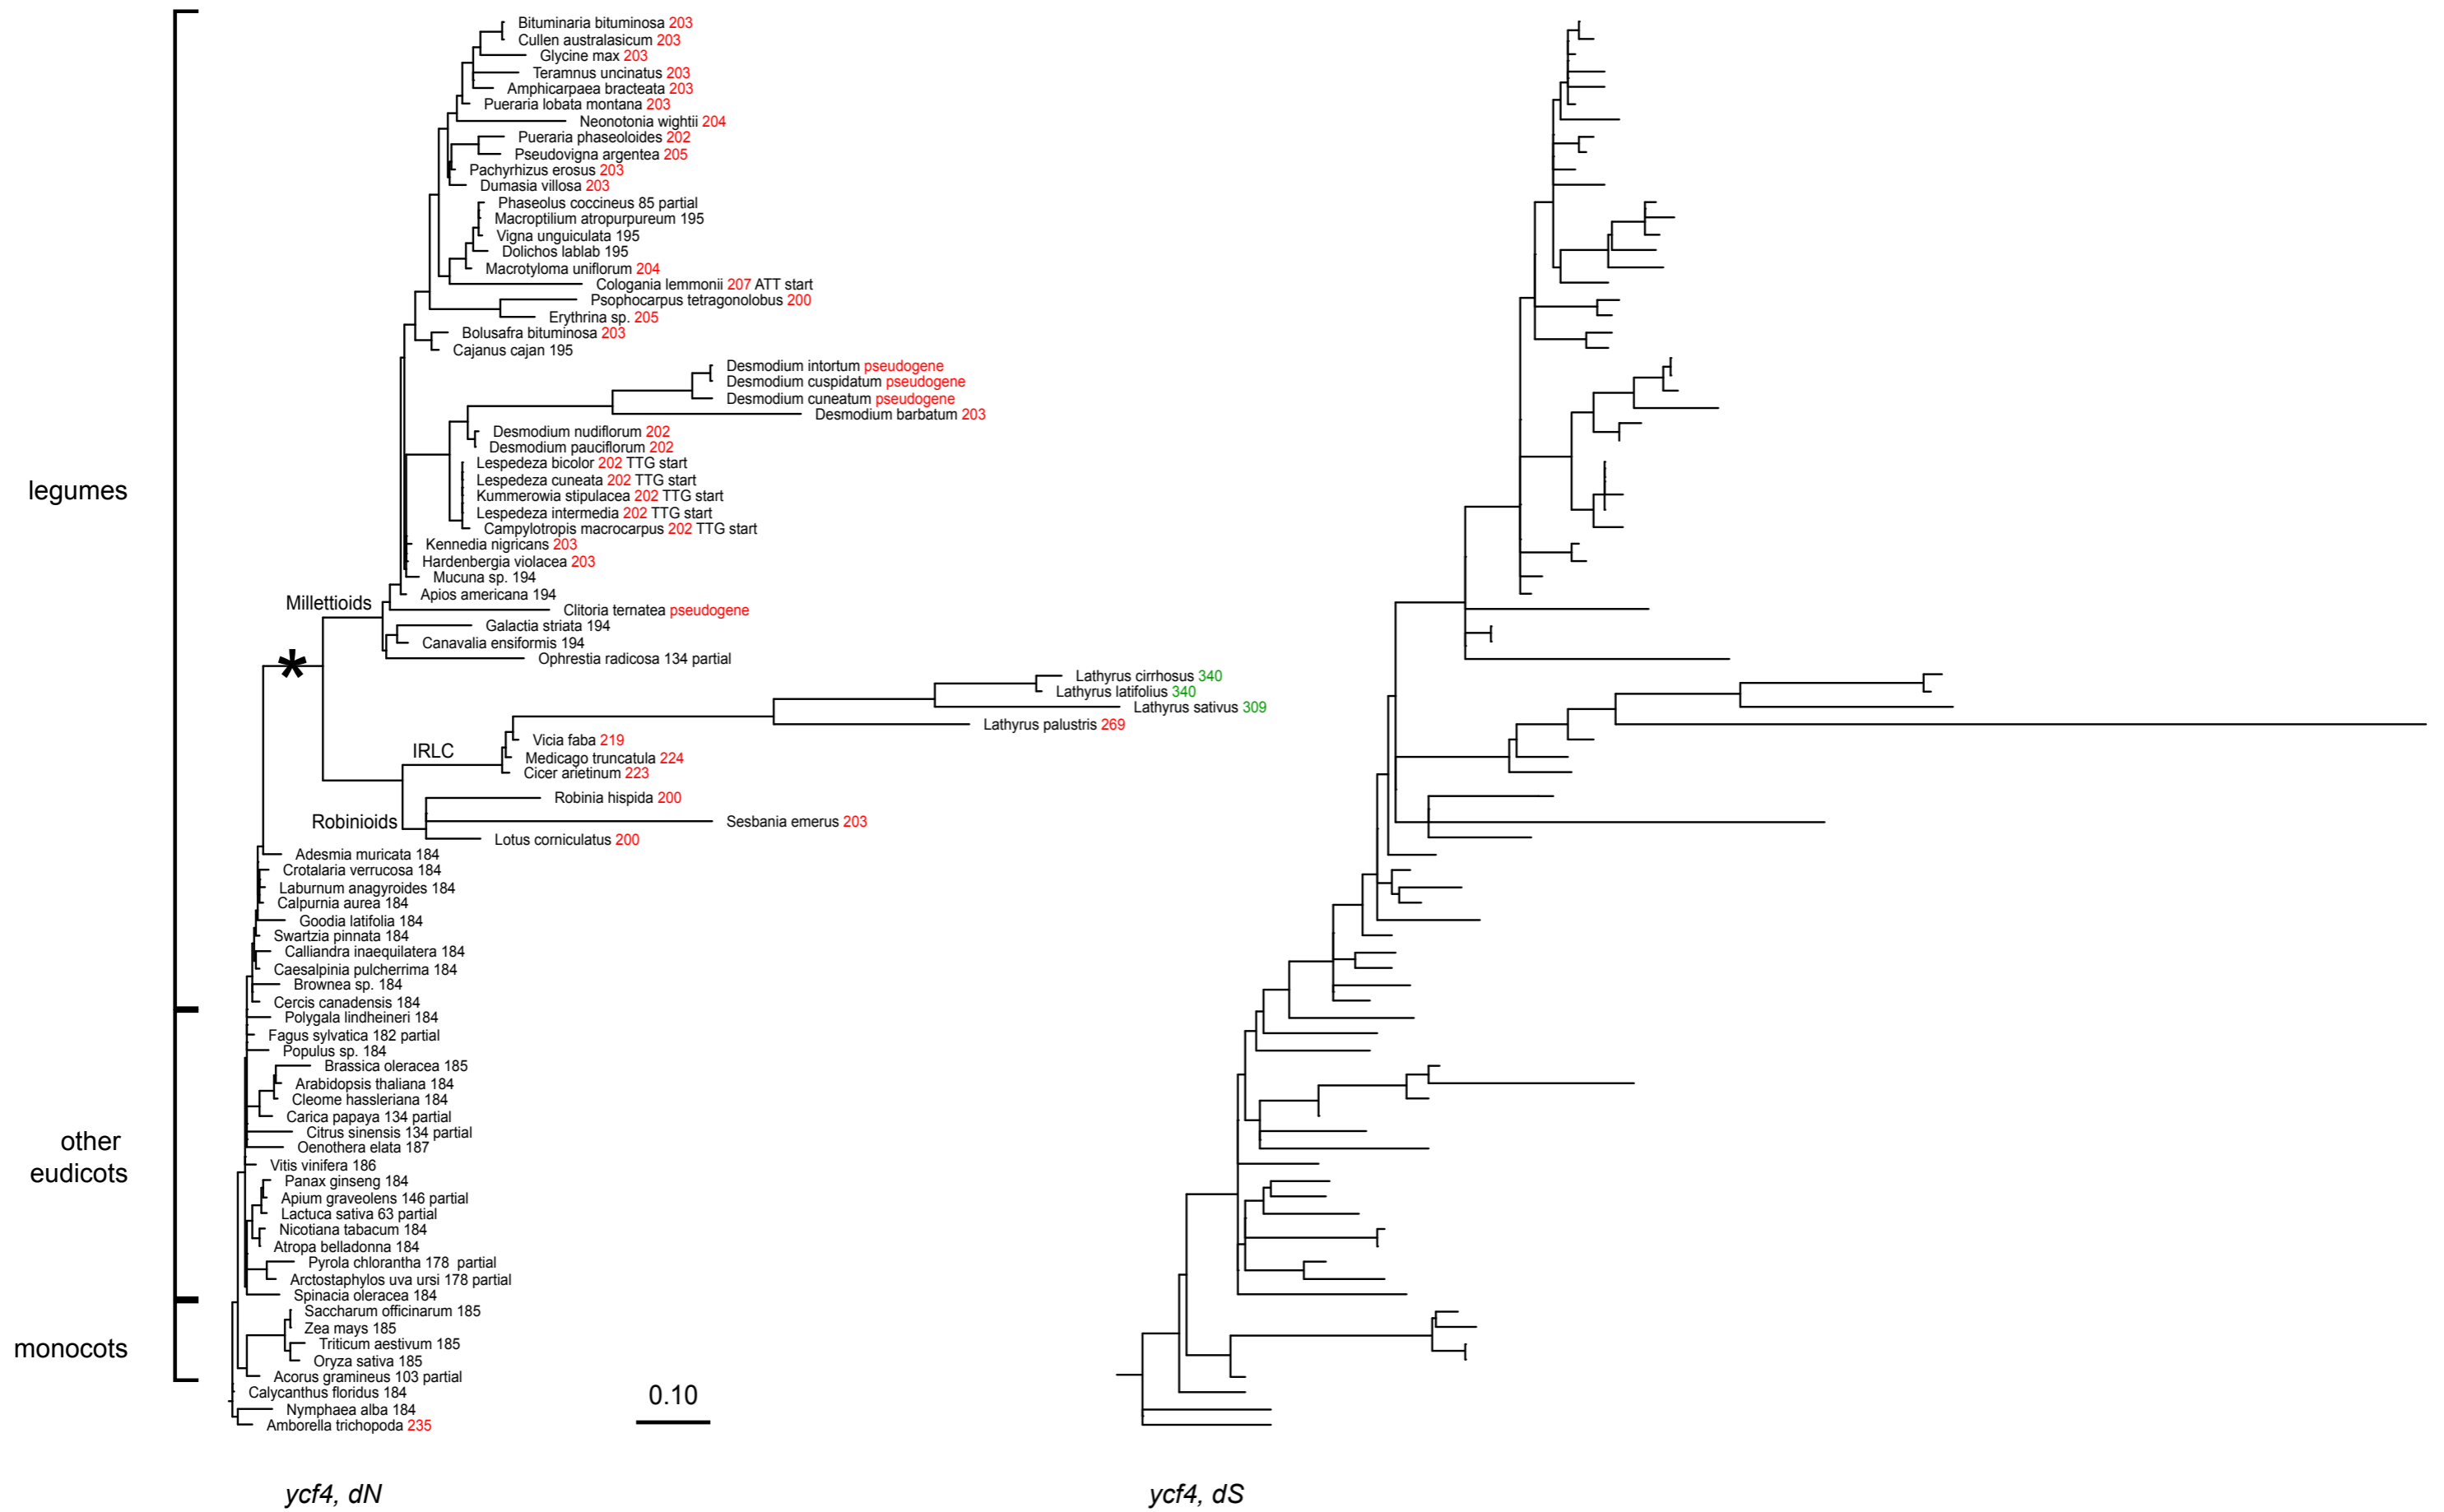

Figure S1C

**A**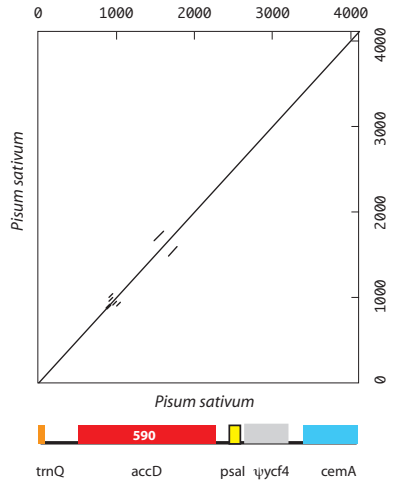**B**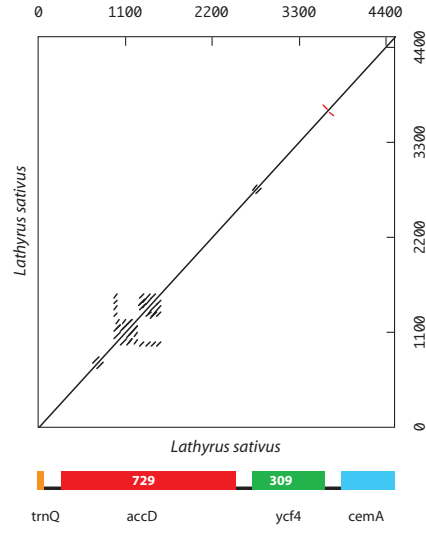**C**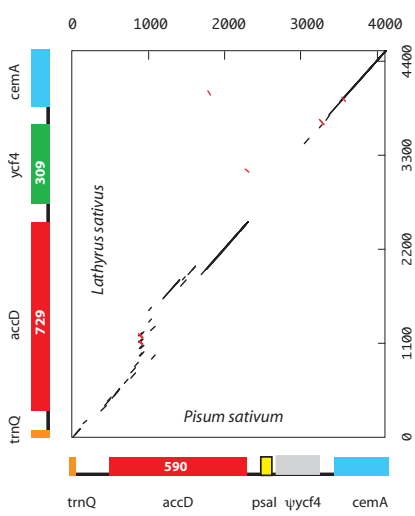**D**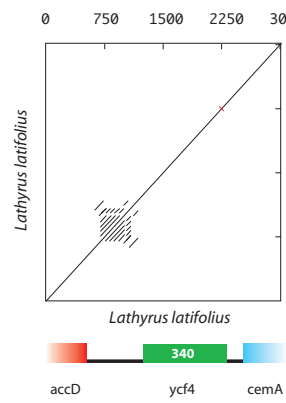

Figure S2

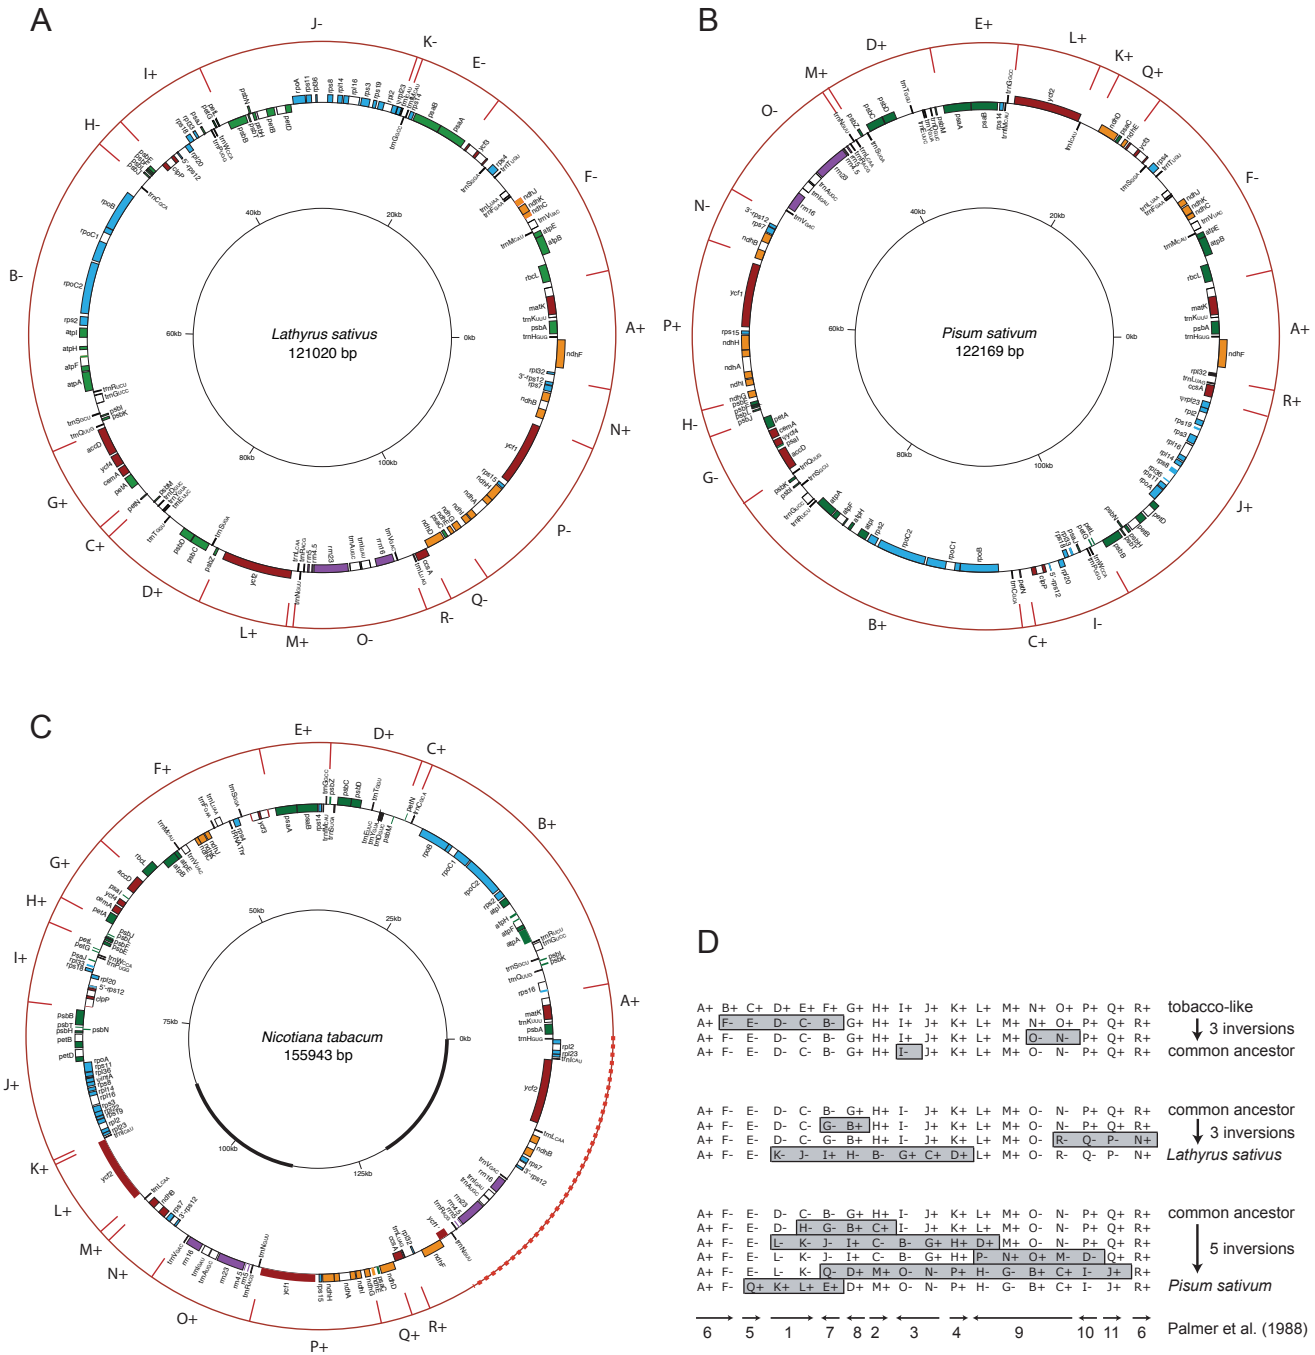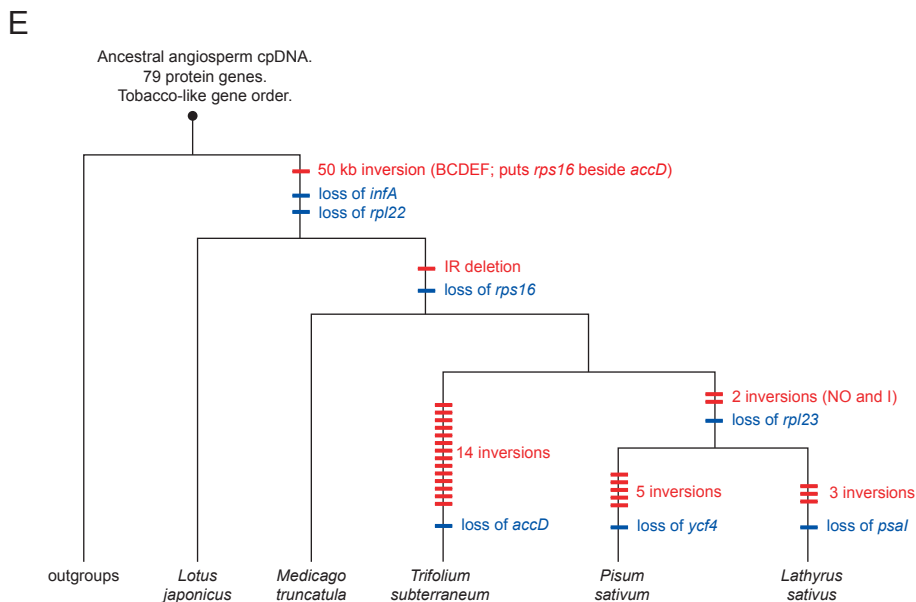

Figure S3

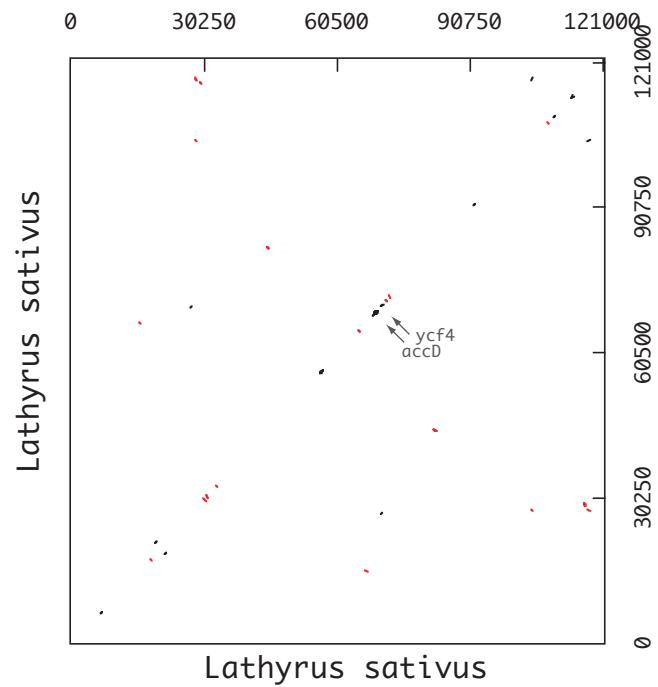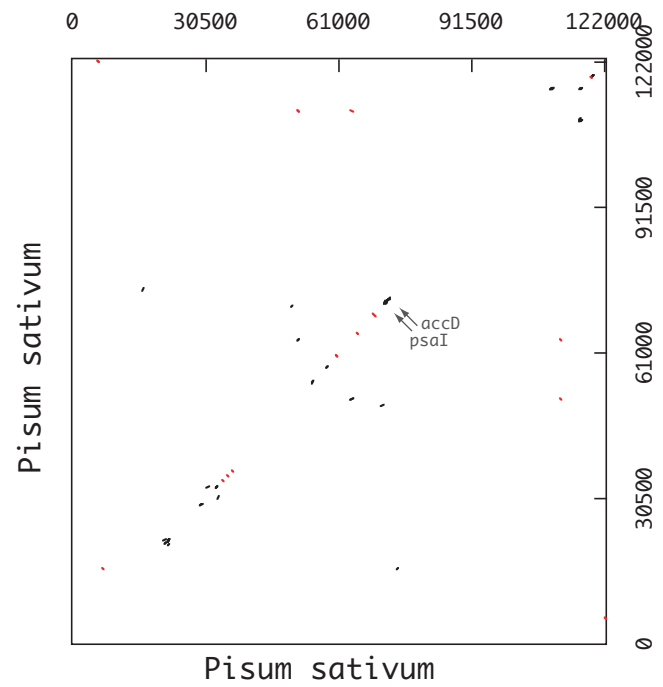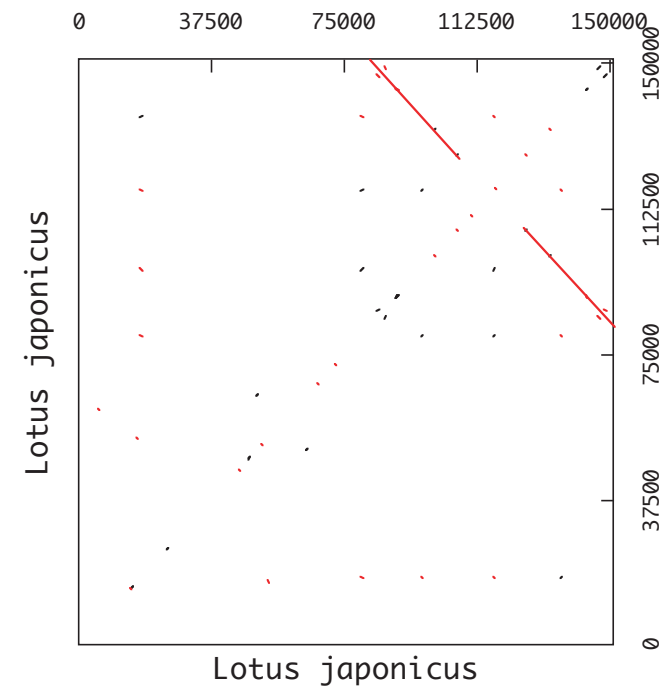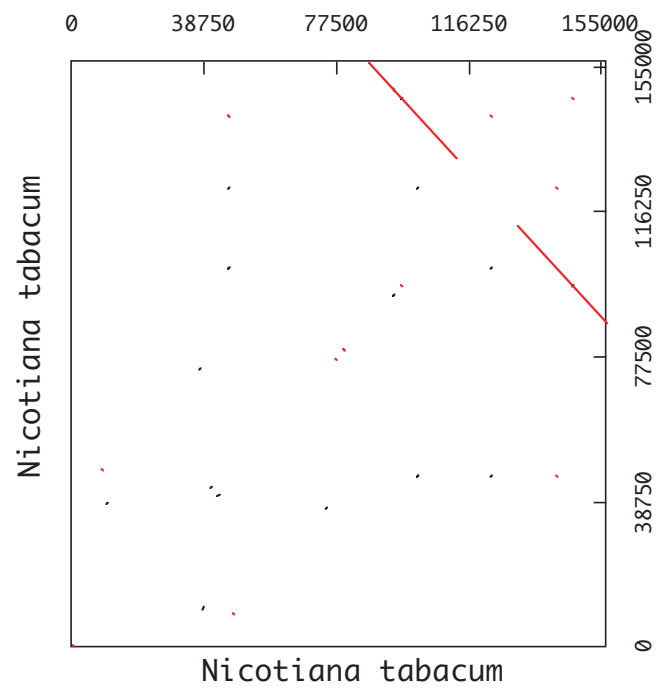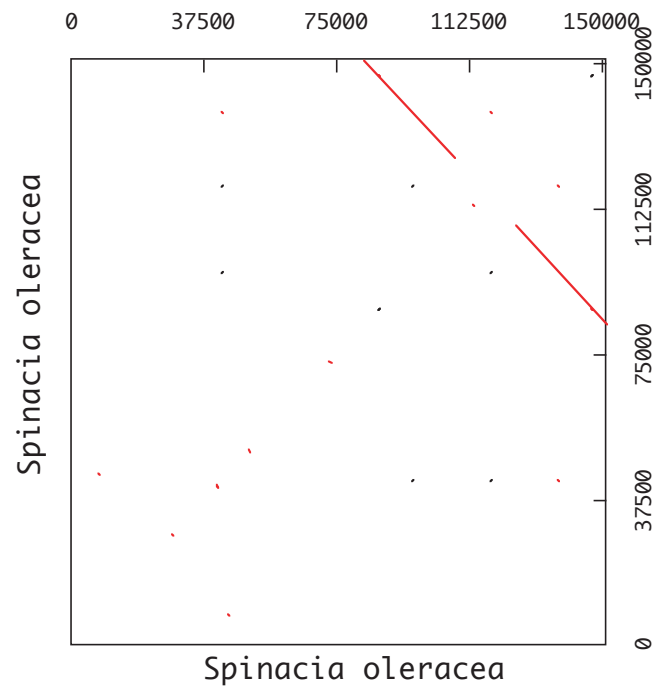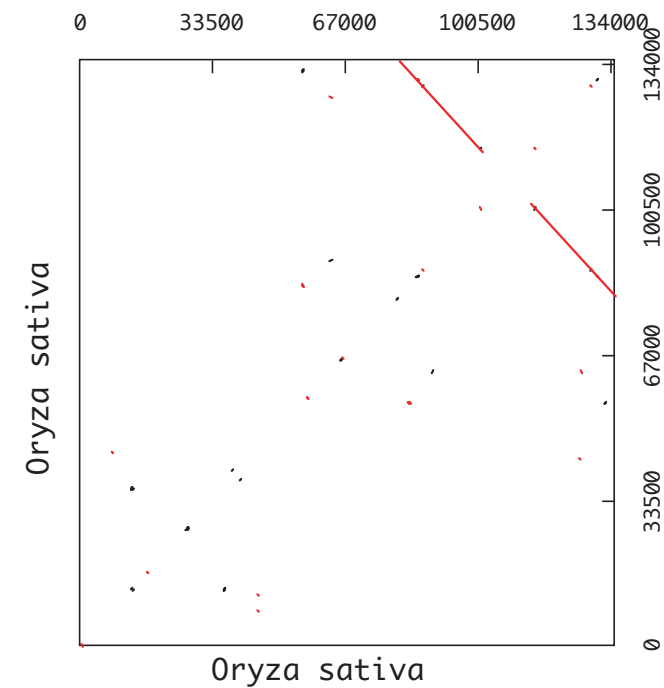

Figure S4

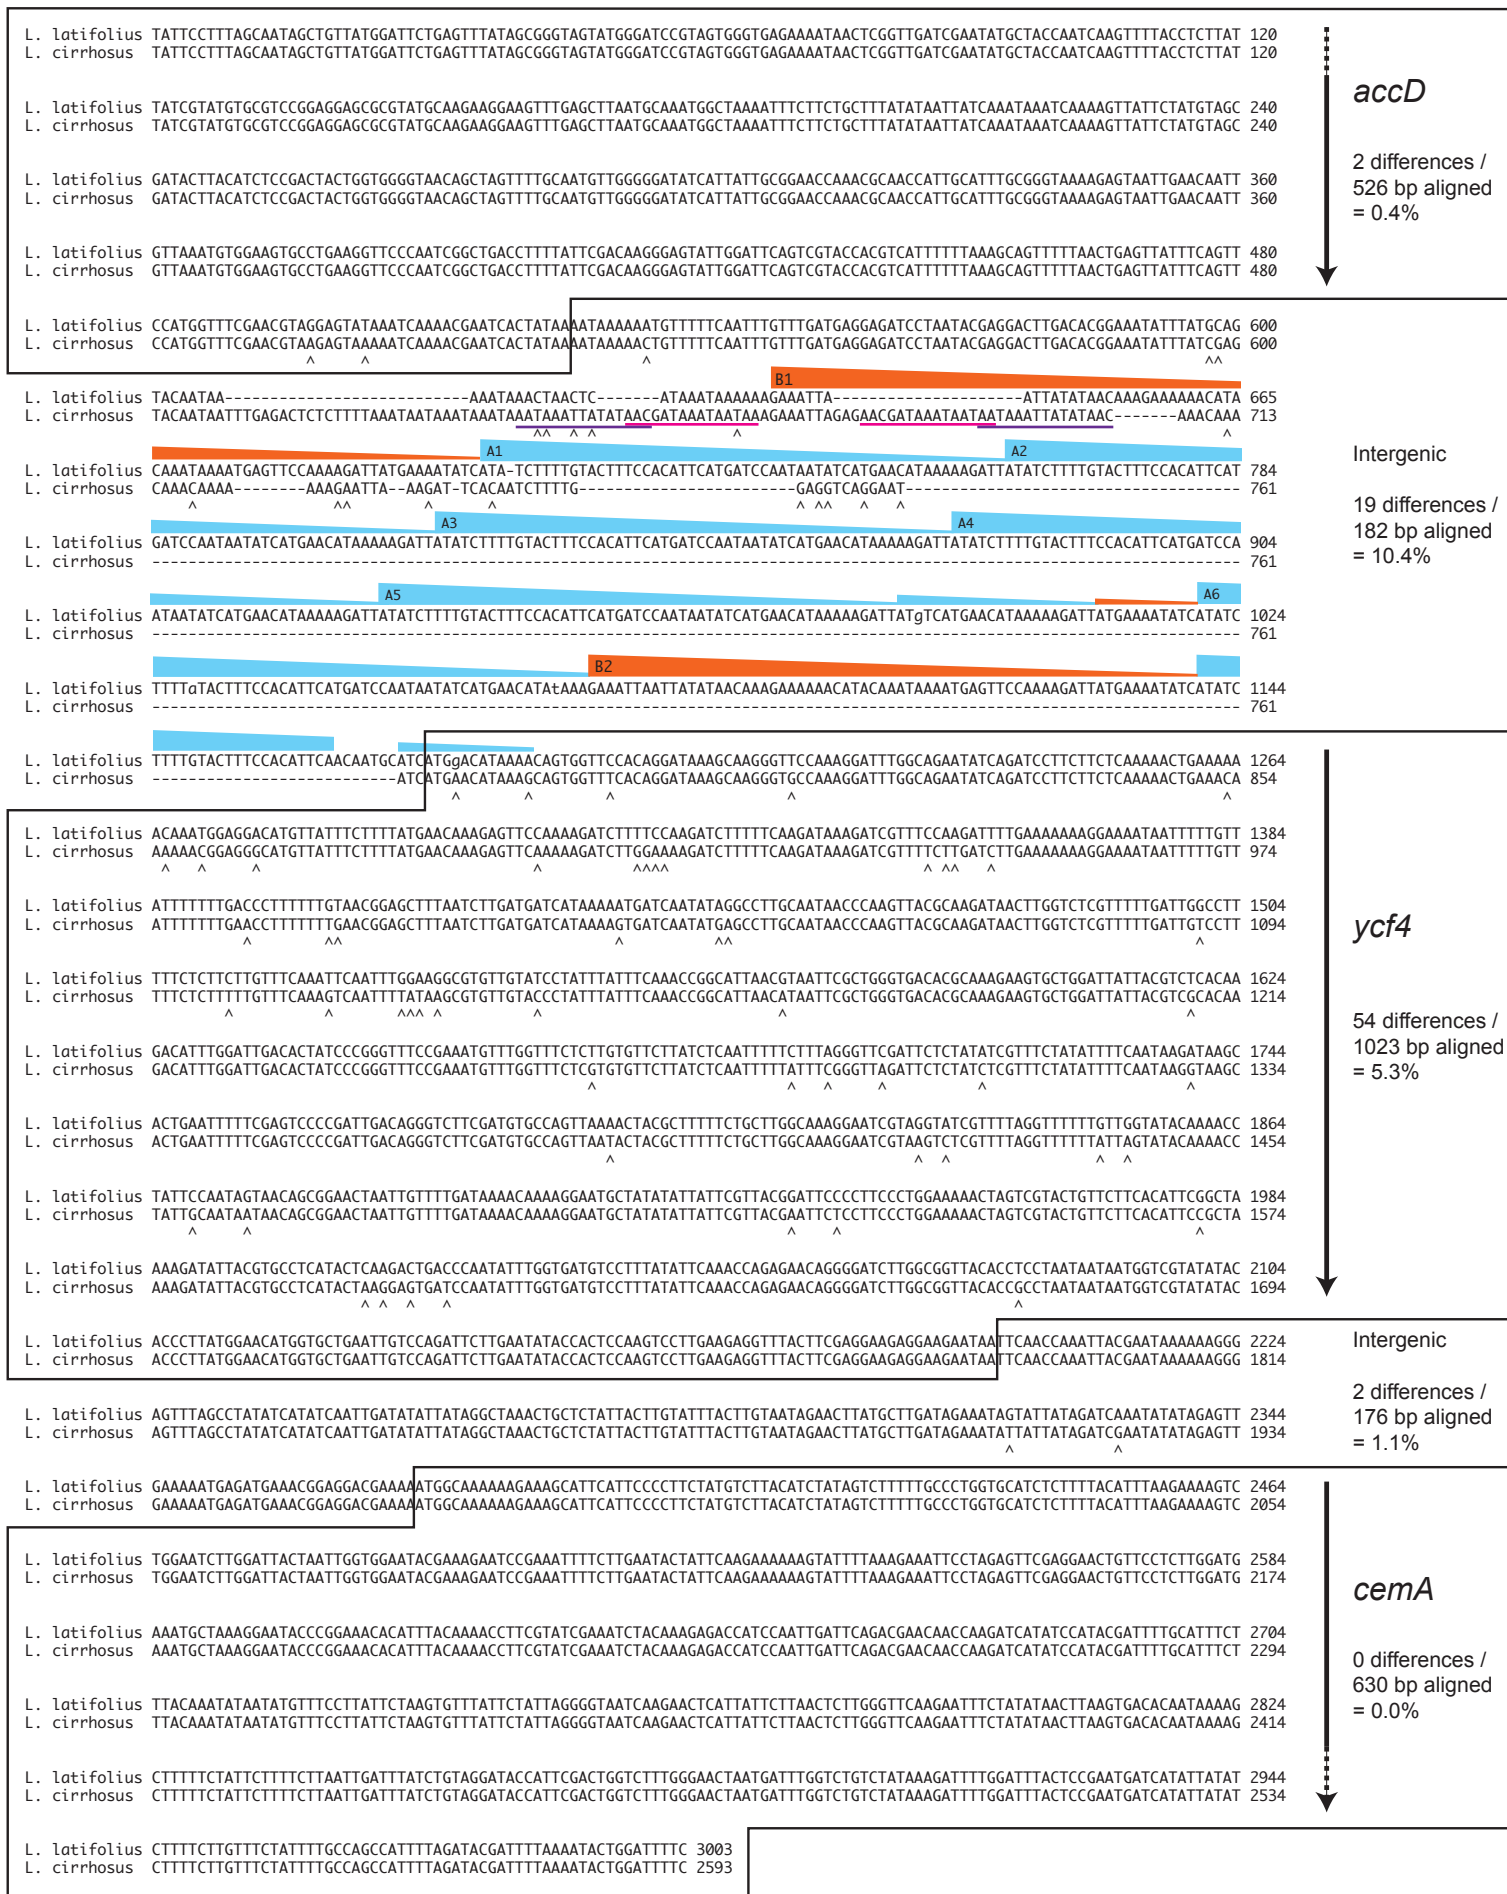

Figure S5

**A**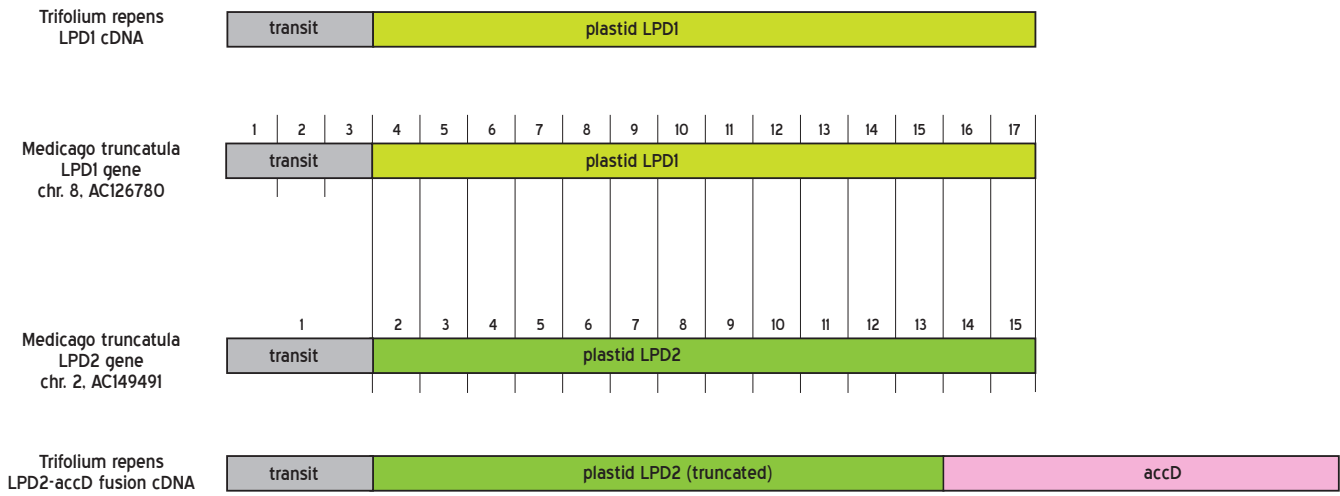**B**

| dN                  | dS | M. truncatula LPD1 | T. repens LPD1 | M. truncatula LPD2 | T. repens LPD2-accD |
|---------------------|----|--------------------|----------------|--------------------|---------------------|
| M. truncatula LPD1  |    |                    | 0.1939         | 0.6453             | 0.5115              |
| T. repens LPD1      |    | 0.0087             |                | 0.5454             | 0.5497              |
| M. truncatula LPD2  |    | 0.0275             | 0.0341         |                    | 0.3035              |
| T. repens LPD2-accD |    | 0.0372             | 0.0439         | 0.0180             |                     |

**C**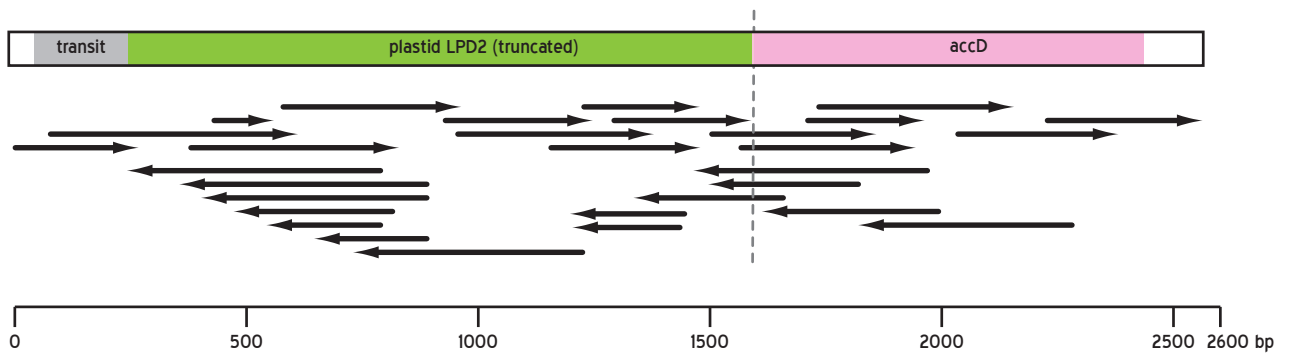

Figure S6 A,B,C

D

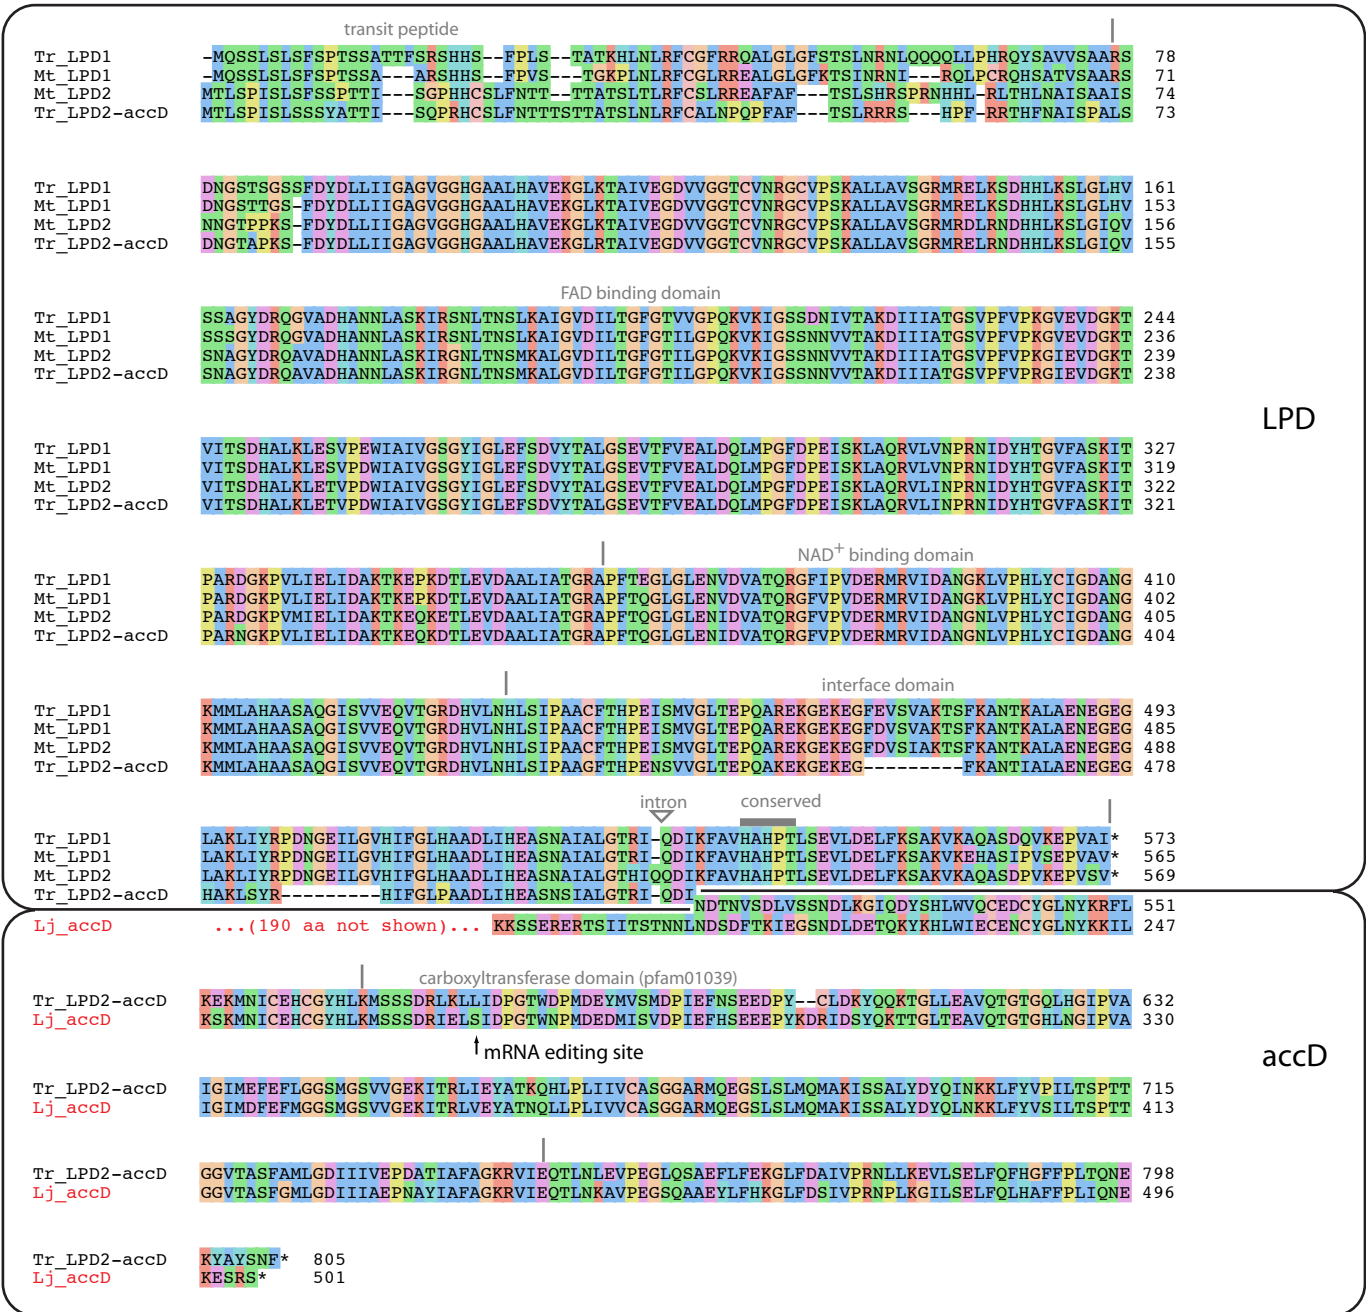

E

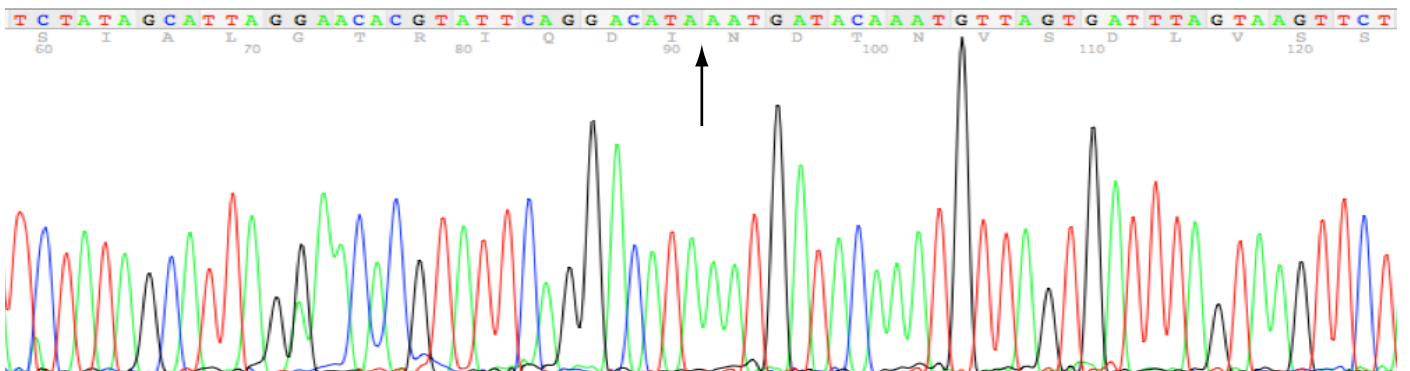

Figure S6 D, E



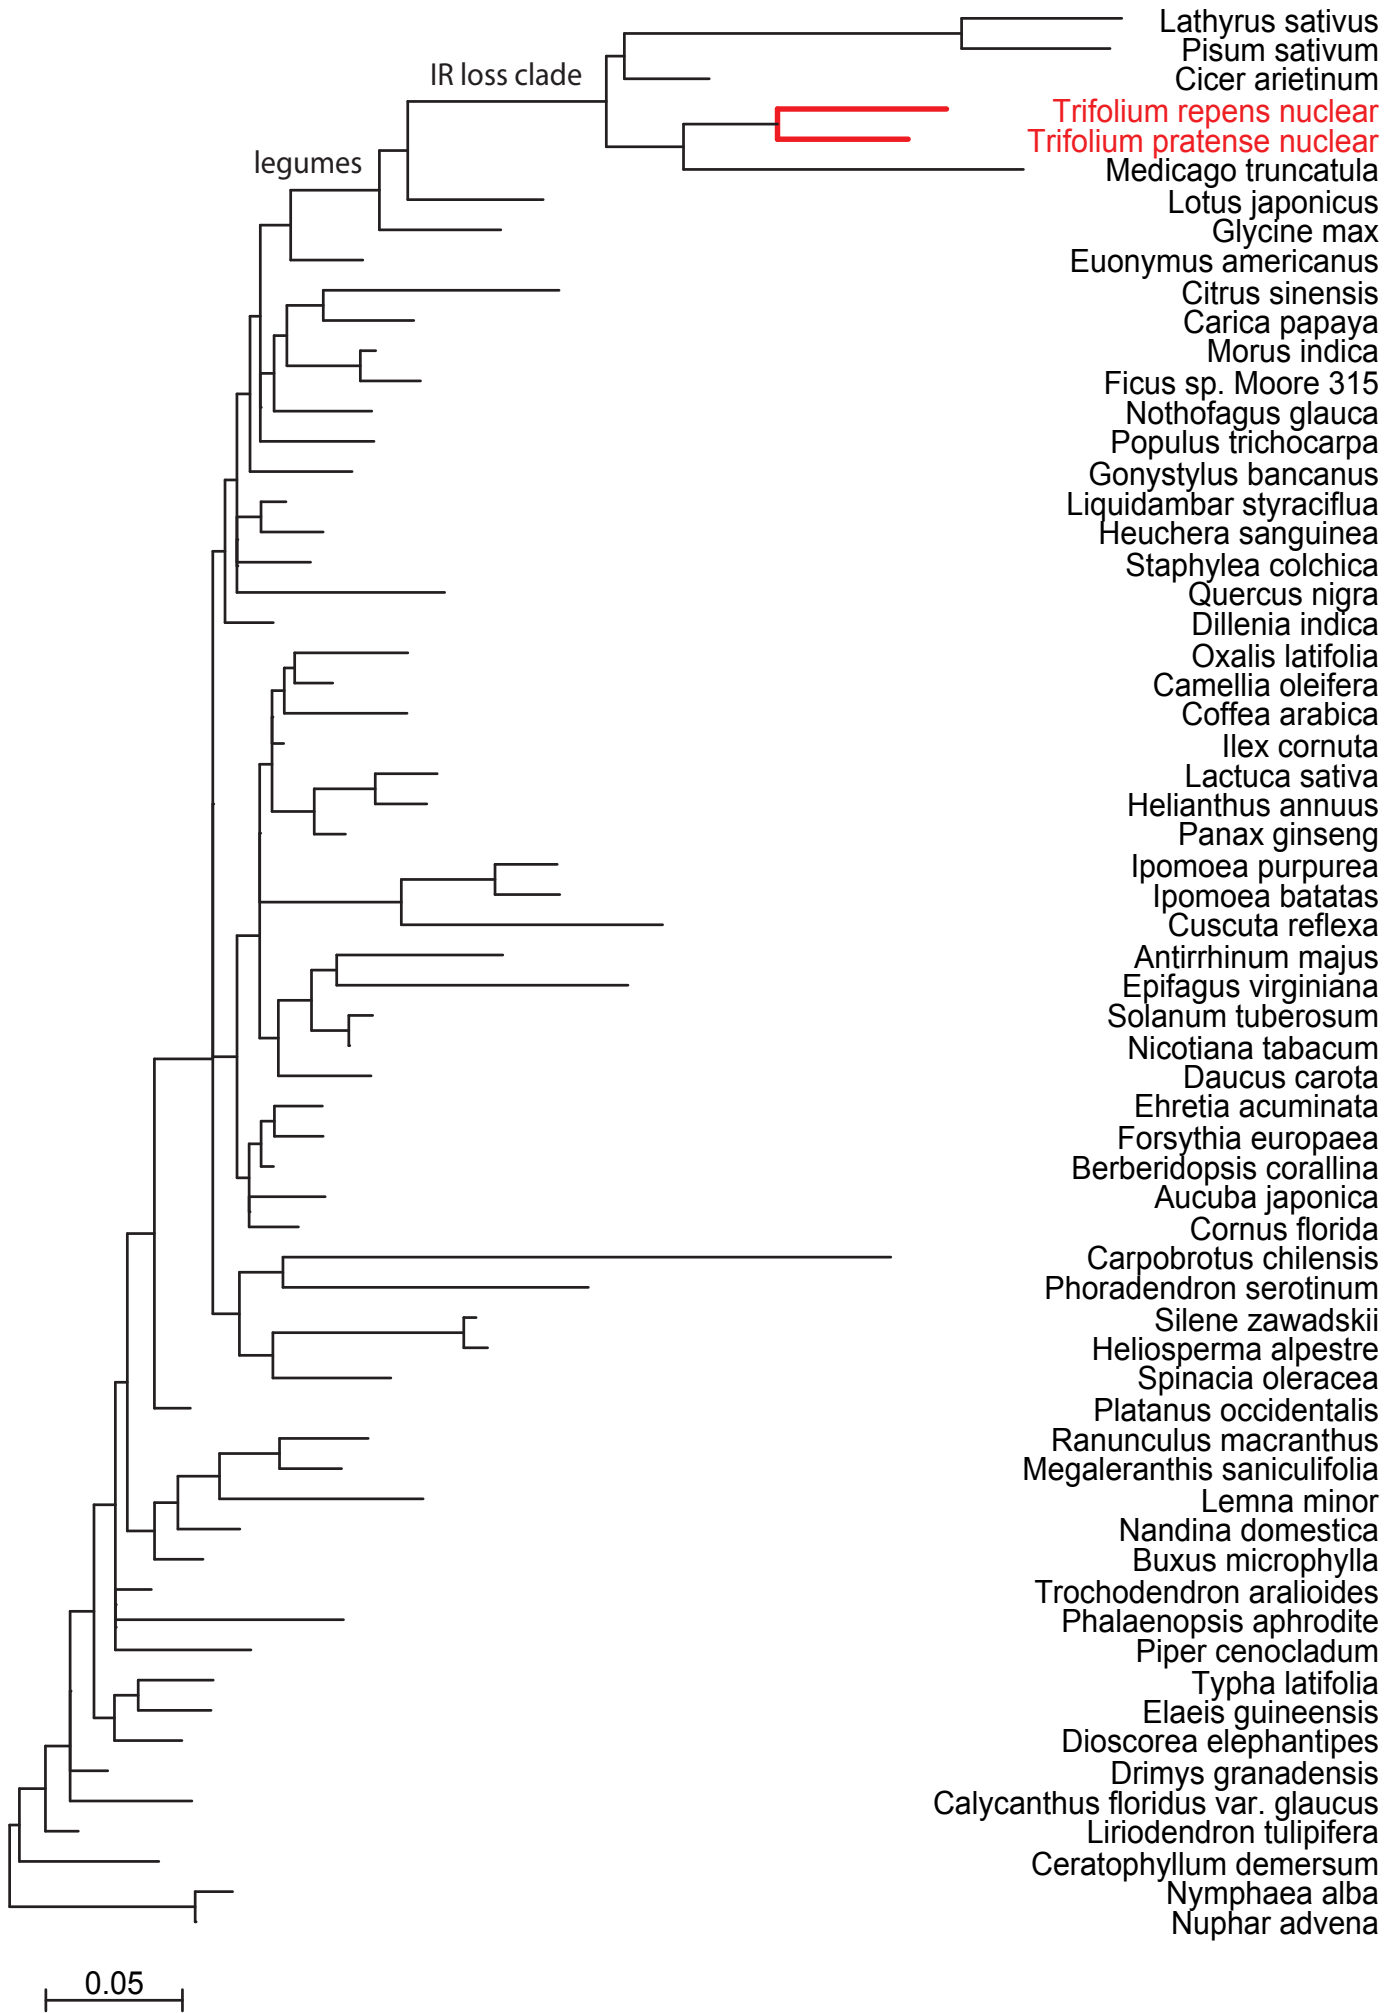

Figure S6 F



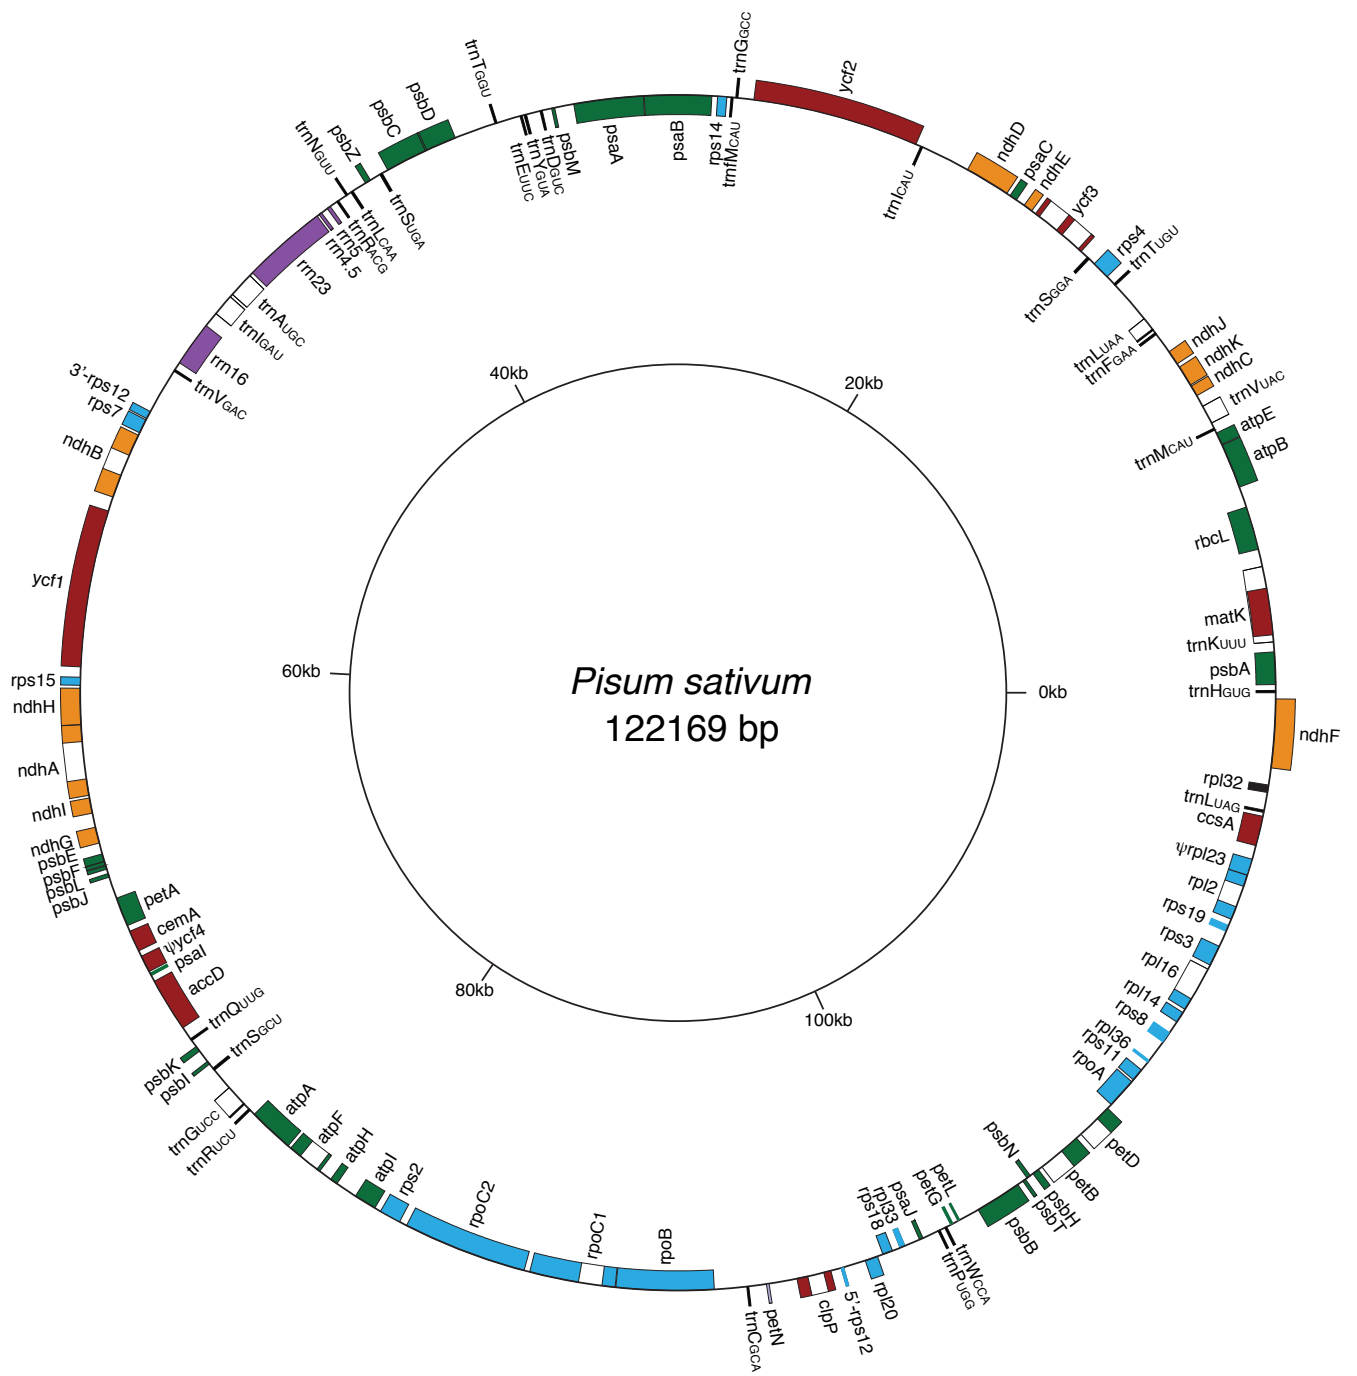

Figure S7B
